# Supplementary material for: Experience and Awareness of Health Managers, Administrators, and Workers on a Hearing Conservation Program in Korea: A Qualitative Study
Source: MDPI journal article supplement (doi:10.3390/ijerph17072302), 2020-03-29
Supplement: s1 [file s1]

## FGD & IDI guidelines for the hearing conservation program experience and perception evaluation

### Ice breaking (10-minute)

- Introduction and purpose explanation on the discussion
- Introduction on the discussion process
- Recording notification and approval confirmation / Inform the discussion process and precautions / Inform about personal information protection
- Participation introduction

### Experience of the hearing conserving program (30-minute)

#### 1. Utilization experience of the hearing conserving program

1) “How important do you think the hearing loss problem is?”

► Inquiry question

- “How important do you think of the problem compared to the other problems in terms of the industrial health?”
- Review statistics of the hearing loss

2) “How much do you think the hearing loss problem in this country has been publicized?”

► Inquiry question

“If not, what do you think is reason behind it?”

### Perception of the hearing conserving program (70-minute)

#### 2. Perception of the hearing conserving program

1) “Have you had any experience in applying the hearing conserving program?”

► Inquiry question

- If so, “Please describe your experience in detail.”
- If not, “Then have you heard of such program? How do you know?”

2) “Do you think it is necessary to have a hearing conserving program?”

► Inquiry question

- If not, “what made you think so?”

\* Provide introduction material on the hearing conserving program

- The hearing conserving program (HCP) for industrial fields is a noise-induced deafness preventative program for field workers who are exposed to excessive noise.
- The hearing conserving program is constituted in total 6 components; 1) noise measurement; 2) engineering

control of noise and administrative management; 3) wearing hearing protective devices; 4) hearing test and medical judgement; 5) health education and training; 6) record documentation and program effect evaluation.

3) “The hearing conserving program is constituted with the followings. Please take a closer look at each components.”

► Inquiry question

- Comprehend problems and improvement plan for each components

4) “What do you think is the reason for reluctant implementation of the hearing conserving program?”

► Inquiry question

- Additional confirmation on various challenges in the hearing conserving program

5) “What measures should be made to vitalize the hearing conserving program?”

Discussion wrap up (10-minute)

- Additional and related questions on the discussion
- Other questions
- Conclude the discussion and show gratitude for the participation
